# Supplementary material for: High Efficiency Silicon Nanowire/organic Hybrid Solar Cell with Two-step Surface Treatment
Source: Royal Society of Chemistry journal article supplement (doi:10.1039/c4nr07173e), 2015-01-01
Supplement: c4nr07173e1.pdf [file c4nr07173e1.pdf]

## Support information

**Figure S1**

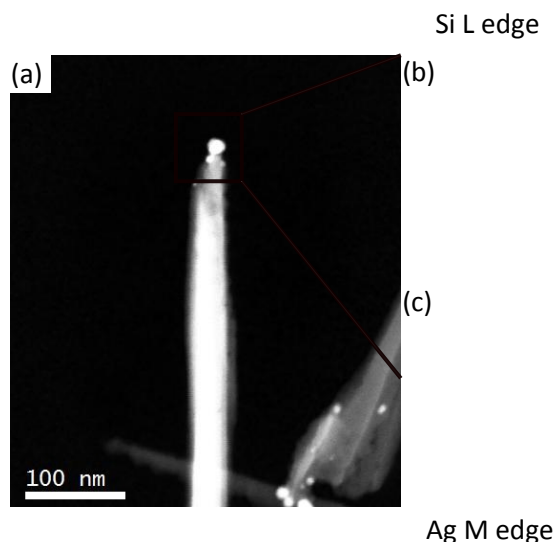

Figure S1. (a) STEM image of a Si nanowire fabricated using the MCEE method. The EELS mapping images based on (b) L edge of Si element and (c) M edge of Ag element. The EELS results clearly indicate that the particle on the top of the nanowires is silver.

**Table S1. The compositions of the Si and O calculated from the EELS spectra of the SiNWs in the various stages of the surface treatment process.**

| Composition | As-grown | After ozone treatment | After HF etching |
|-------------|----------|-----------------------|------------------|
| Si (at%)    | 85.32    | 39.9                  | 65.6             |
| O (at%)     | 14.68    | 63.1                  | 34.4             |

**Figure S2**

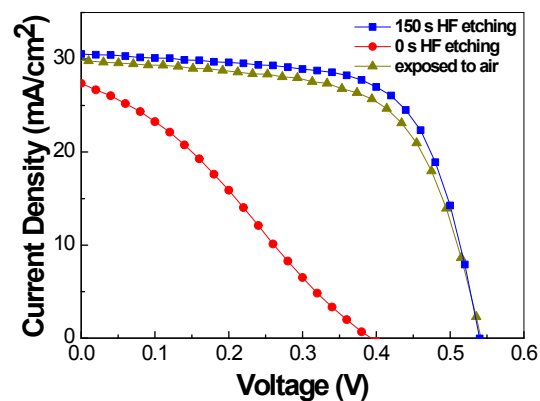

Figure S2. J-V characteristics of the hybrid cells based on the SiNW etched with HF solution for 0s and 150 s after ozone treatment, as well as SiNWs directly exposed to air for 1 day. The SiNW hybrid cell after 150 s HF etching shows PCE of 10.9% with a  $J_{sc}$  of 30.5 mA/cm<sup>2</sup> and  $V_{oc}$  of 0.54 V. Without the HF etching process, the  $V_{oc}$  (0.39 V) and the FF (29.5%) are degraded due to the larger  $R_s$ . The sample exposed to the air for 1 day reveals a  $V_{oc}$  of about 0.54 V.
